# Supplementary material for: Intracellular Eukaryotic Parasites Have a Distinct Unfolded Protein Response
Source: PLoS One. 2011 Apr 29;6(4):e19118. doi: 10.1371/journal.pone.0019118 (PMC3084755; doi:10.1371/journal.pone.0019118)
Supplement: Figure S2 — Results of ClustalW alignment of putative PERK proteins from each species evaluated in this study (plus two additional Leishmania species). Rows are described by species and, in parenthesis, protein identifier for each putative PERK protein. Due to the excessive size of the Toxoplasma gondii PERK the first part of this protein (amino acids 1–3276) was removed. Jalview (www.jalview.org) was used to visualize the alignment. Numbers on either side of the sequence indicate the position in the protein, and coloring indicates degree of sequence conservation where darker purple reflects more highly conserved amino acids. (PDF) [file pone.0019118.s002.pdf]

|                                  |      |                                                                                                                                                                                                                                                           |      |
|----------------------------------|------|-----------------------------------------------------------------------------------------------------------------------------------------------------------------------------------------------------------------------------------------------------------|------|
| Toxoplasma gondii (Q6J2D6)       | 1    | TDVQ TPGEEASPRQGLAKSQWGDGRAGRQMRARELRLSELRRARRKVDFFLVQ TVGPPALALPGQGD IRFRYRGSLSLAASVSSGSGVSSSSSPATAPNARGSRSSPAPPLAPGACDPFGRHAGETA TEE                                                                                                                    | 3402 |
| Mus musculus (Q9Z2B5)            | 227  | -----N ERATRPGRERALLLLLLPFLGLCAAG ISAVAPARSLAPASETVFGGLGAAAAPTSAARVP                                                                                                                                                                                      | 59   |
| Homo sapiens (Q9NZJ5)            | 1    | -----N ERASIPGGLLVRRALLLLLLGLLAARTVAAGARGRLPAPATAEAFGLGAAAAPTSAARVP                                                                                                                                                                                       | 62   |
| Drosophila melanogaster (Q9NIV1) | 1    | -----M QDDIDG IVRRHRRSLF LQ IV TLT TMAGLVAFDP AQOVLAHF                                                                                                                                                                                                    | 42   |
| Leishmania infantum (A4I9Y7)     | 1    | -----M P O D A R L Q P F S L V G I E A T V R P E Q R R S A G K R S G T H C R P L E R F F L F L F L A A L A L C S V                                                                                                                                        | 56   |
| Leishmania major (Q4Q2Y5)        | 1    | -----M P O D A R L Q P F S F V G I E A T V R P E Q R R R S A G K R S G T H G G P L R K R F F L F L F L T A L A L C S V                                                                                                                                    | 56   |
| Leishmania braziliensis (A4HAS7) | 1    | -----M Q D A R L Q R F S F V G I E A T V R P E Q R R R A G S C S G K H V E L L T R L L C L F L T L L A L S P V                                                                                                                                            | 56   |
| Caenorhabditis elegans (Q19192)  | 1    | -----M S V Y I V L A G F L L F M A L V P F N A G Q Q Y I D D D I E V V S S C Q N G Y V Q N A G C D Q N S V N I I T A T                                                                                                                                    | 60   |
| Plasmodium falciparum (Q43948)   | 1    | -----M K K R I R S S Y K V G S S N K Y H K N Y T D N E K D K K Y R S                                                                                                                                                                                      | 43   |
| Trypanosoma cruzi (Q4E5B6)       | 1    | -----M P D A S I R I G L L I L C I L T L G L S F G V G S T T L L S                                                                                                                                                                                        | 36   |
| Trypanosoma brucei (Q584D7)      | 1    | -----M P D A Y V F A A S L L C C L W A L T G S V P R G G D T E A T                                                                                                                                                                                        | 36   |
| Toxoplasma gondii (Q6J2D6)       | 3403 | G V S V A S V L D L R C G E E R A A A A S P F S L V S S R S T G E R M R R A R A P S S P M E L I G E R M O S S P F L E A I R S A R A F A D E A S I L P P P L V A A S A G L P G P L I V A P D S P D A C C A G E E T G F I G A R G A G A G G G M A F G G G   | 3528 |
| Mus musculus (Q9Z2B5)            | 60   | A V A T A E V T V E D A R A L P A A A G P E S R A T E P D D D V E L R P R G R S L V I S T L D G R I A L D A E N D G K K W D L D V G S G S L V S S S L S K F E V F G N                                                                                     | 146  |
| Homo sapiens (Q9NZJ5)            | 63   | A V A A A E V T V E D A R A L P A A A G P E R P G P D D E T E L R P R G R S L V I S T L D G R I A L D P E N H G K K W D L D V G S G S L V S S S L S K F E V F G N                                                                                         | 149  |
| Drosophila melanogaster (Q9NIV1) | 43   | -----T T D S E L Q T A G S P R P P L E H C V D Q E E R V A R R L L Y I S T L D G R L S A L D I A K S C K L R V S V P T C P G P L I S S S I H R L E L T N N G Q                                                                                            | 121  |
| Leishmania infantum (A4I9Y7)     | 57   | C S Q A S S A P F H P A R H I G A D E A L S N A P S A R S V A L R Y T P P G S S L A L L V T E G G H L H A Y D L E R G Q H A W C A D A G G D M V T V T I D I P                                                                                             | 136  |
| Leishmania major (Q4Q2Y5)        | 57   | C R S O A S A P H F H P A R H I G A D E T L S N A P S V S V A L R Y T P P G S S L A L L V T E S G H L H A Y D L E R G Q H A W C A D A G G D M I T V T I D I P                                                                                             | 136  |
| Leishmania braziliensis (A4HAS7) | 57   | C H S O T P S T S N P K G D I A V E D T L F D A P S A R S V A L R Y T P P G T S L A F L V T A S G H L H A Y D L E R G N Y A W C A D A G G D M I T V T I D M E                                                                                             | 136  |
| Caenorhabditis elegans (Q19192)  | 61   | L D G V V T A L D G E T E M I W R Y E D A P L L R G T L S T S D P I D I G G T S L Q L M P T L D G R L F S Y T H N T N L I E P L P I T D T S L L E S T I R L G                                                                                             | 140  |
| Plasmodium falciparum (Q43948)   | 44   | M F D K K E F L N F L N F N K F M K K N S L V D H L M K M N D K A E D N Y D G Y N S S G S R Y N N I N D D G V E L C G T K R Y T N N K N N S D Y L N Y N N N N                                                                                             | 125  |
| Trypanosoma cruzi (Q4E5B6)       | 37   | A H A Q D A N L L K N V E T E S A G D E I S A S R P D N K E L V P S Y R L H P S N R L L L L K D G K I S S Y G L D N G V P M N T V D T G G D M L R V E I E K H                                                                                             | 116  |
| Trypanosoma brucei (Q584D7)      | 37   | S G A E N N-----I L P L A V T F P S C L L L L Q M D G N I T A R W L D S G S H M N T V N T G G N I I S V D V L R H                                                                                                                                         | 92   |
| Toxoplasma gondii (Q6J2D6)       | 3529 | R G R P A E P W E V R G R G G G E G Q A R P G D T H D G I V G G E G L E P E G K R Q T E R E T V T P I Y L P G G R M G G G Y A G E M F S A E E W Q R V M F R R A G R R C N S V G O L T V Y G G G H E A S R G S T A H A R G G M P K P L P F V L P P G V C   | 3654 |
| Mus musculus (Q9Z2B5)            | 147  | -----K M I I P S L D G D L F Q W D R D R E S M E A V F T V E S L L E S S Y                                                                                                                                                                                | 221  |
| Homo sapiens (Q9NZJ5)            | 150  | -----K M I I P S L D G A L F Q W D R D R E S M E T V P F T V E S L L E S S Y                                                                                                                                                                              | 224  |
| Drosophila melanogaster (Q9NIV1) | 122  | -----F V R M I P S L S G G I Y K F D G-----S I D P I P I T A E H L L S S A                                                                                                                                                                                | 195  |
| Leishmania infantum (A4I9Y7)     | 137  | -----P S K E A A L R D P L A L P F L V R G N S                                                                                                                                                                                                            | 181  |
| Leishmania major (Q4Q2Y5)        | 137  | -----P S K E A A L R D P L A L P F L V R G N S                                                                                                                                                                                                            | 181  |
| Leishmania braziliensis (A4HAS7) | 137  | -----P S K E A L R D P L A L P F L V R G N S                                                                                                                                                                                                              | 181  |
| Caenorhabditis elegans (Q19192)  | 141  | -----Q D A V A G G K S V T T K G P D L F T G E Q                                                                                                                                                                                                          | 191  |
| Plasmodium falciparum (Q43948)   | 126  | -----M K N K R Y S N K K H N D N I I N N N                                                                                                                                                                                                                | 177  |
| Trypanosoma cruzi (Q4E5B6)       | 117  | -----P T E R V I R D P L A L P F L E G G M                                                                                                                                                                                                                | 176  |
| Trypanosoma brucei (Q584D7)      | 93   | -----A T R E V I R R D F A L P F I I E G G M                                                                                                                                                                                                              | 141  |
| Toxoplasma gondii (Q6J2D6)       | 3655 | A E A G A T P Q S D V L V R P G P V S P R P Q T A D E R K C G D G S G G S S G G R T A M G L A D P N G G V Q P L I G D V D S A S A S S P V S R A A S S O A V A S R L L P S G I H E V K Q E T V A V S L P S R G D S D E G A T P E S R I T D G V S P S P     | 3780 |
| Mus musculus (Q9Z2B5)            | 222  | S D-----E M E E E D I L L-----L Q R T Q T T V R A V G P R S G S E K W N F S V G H F E L R Y I P D M E T R A G F I E S T F K P G N K E D S K I I S D V E E Q                                                                                               | 297  |
| Homo sapiens (Q9NZJ5)            | 225  | S D-----E M E E E D I L L-----L Q R T Q T T V R A V G P R S G N E K W N F S V G H F E L R Y I P D M E T R A G F I E S T F K P N E N T E E S K I I S D V E E Q                                                                                             | 300  |
| Drosophila melanogaster (Q9NIV1) | 196  | E G L A I D D T I R E E D E D Q L E-----D E Q L R D E A G Y I V R H D P L L D V I I V R R O T Q T V R A V E S R T G V E R W N F S V G H E L D L V R P E C Q L P R                                                                                         | 281  |
| Leishmania infantum (A4I9Y7)     | 182  | -----L P Q S L R P Y-----F F M N I S T L L R R Q T L F L G G T D V V Y T T S V Q V A D L D A S T G R F V G G L E T P S Q A F C G S N A T R S P P R G D S T T                                                                                              | 255  |
| Leishmania major (Q4Q2Y5)        | 182  | -----L P Q S L R T Y-----F F M N I S T L L R R Q T L F L G G T D V V Y T T S V Q V A D L D A S T G R F V G G R E T P S Q A F S G S N A P R S P P R G A S T T                                                                                              | 255  |
| Leishmania braziliensis (A4HAS7) | 182  | -----L P Q F L R P Y-----F F M N I S T L L R R Q T L F F G G T D V V Y T T S V Q V A D L D A S T G R F V G R E A R S O T F C S S N S T R S S P C D S T A                                                                                                  | 255  |
| Caenorhabditis elegans (Q19192)  | 192  | -----S I R A M D T L R G I-----E R W N L S T A E I G V T I A G I T S P T L V S D V K I L Q P D P G V I A V D K Y N R E E W K T N V D G H I V S V W Q V Y G N                                                                                              | 268  |
| Plasmodium falciparum (Q43948)   | 178  | -----N N K I N N N-----T K N K I D T I R N I S H E K L G N N K S S A R N L S L I Q T S H I P Y D A P L A D                                                                                                                                                | 228  |
| Trypanosoma cruzi (Q4E5B6)       | 177  | K T R S G S G D S C E I P F S S T H P R-----C F M N L S T L I E K K H V Q V G E T D I F V T T S A H I M D V S N D G K P V P E T                                                                                                                           | 239  |
| Trypanosoma brucei (Q584D7)      | 142  | G D D Y E D D Y I D D A E L T P S H P Q-----F F M N L S T L I R R R H V N V E N T E I Y V T T S V O L M D Y S H T G I E I M R P                                                                                                                           | 204  |
| Toxoplasma gondii (Q6J2D6)       | 3781 | I A T H P A S T L P L G G G L S L A P D E A R G S L A H G D A L K A L E A L S G V T T A Y V G S A S G S V G D S A N S A S G A V L K V V N S E V A G V L D E S G L V L T S A A R L M A V G G G H A T V E E G G T E Q R E A G L A Q E V H L A G A A R P G   | 3906 |
| Mus musculus (Q9Z2B5)            | 298  | -----E A T M L D I V I K V S V A D W K V M A F S R K G R L E W E Q F C F P-----I A S A W L V R D G K V I P I S L F D D T S Y T A S E E A L D E E D I V E A A R G A T E N S V Y L G                                                                        | 385  |
| Homo sapiens (Q9NZJ5)            | 301  | -----E A A I M D I V I K V S V A D W K V M A F S K K G H L E W E Q F C F P-----I A S A W L L D G K V I P I S L F D D T S Y T S N D E V L D E E D I V E A A R G A T E N S V Y L G                                                                          | 388  |
| Drosophila melanogaster (Q9NIV1) | 282  | -----D E L E L A V I D V D I K V V P E G I I C A F S K S E P Q T M L W K K F D H P-----I V S A W N T A D D E L Q P I D L F S S A Q W L W D Q-----D E N D T E L P N A P Q S P P S I Y L G                                                                  | 370  |
| Leishmania infantum (A4I9Y7)     | 256  | -----E S H R V P H N E L L P L L H I R Y N I V L H V V R P G E Y S W S I C L S O L-----R M S P R A V V Q F R P F S P F S A H S A A D T S S A A P E D D S E H T P R F F S Q F M R N M F D Y D D E H V N                                                    | 352  |
| Leishmania major (Q4Q2Y5)        | 256  | -----E S H R V P H N E L L P L L H I R Y N I A L H V V R P G E Y S W S I R L S O L-----R M S P R A V V Q F P L H F S A H S A A D T S S A A A T D D S E H T P R F F S Q F M R S M F D Y D D E H V N                                                        | 353  |
| Leishmania braziliensis (A4HAS7) | 256  | -----D P O H I S N H E L L P L L H T V R Y N I F L H A V K A G E Y S W S I S L S O L-----R M S P N A V T O P S S P H F S E H S A A D I S S S P R D G S E K A P R F F S Q F M R N M F D Y D D E H V N                                                      | 353  |
| Caenorhabditis elegans (Q19192)  | 269  | -----Q I G E I S I P D P S N I F T T Q Y E V M Q R E Q H N L Q T O S L L Y M G T S N G F F F I Q S P K A K N N L K Q R M A L P E L S T M T E L T N P R F C T A N E E T R S L A Y N V K D E T L R L V L H N A F R                                          | 373  |
| Plasmodium falciparum (Q43948)   | 229  | -----F L E N G R L R T F E N I S L I Q G G G F G S V Y K V S H R L E P G S-----P T Y A V K F I Y L K V S S L D N V S S R R Y F R E I A N R D I Y S K H V V R Y Y T W C E P O F L P                                                                        | 317  |
| Trypanosoma cruzi (Q4E5B6)       | 240  | -----N S L F S Y L H V V R Y D T V H V R R P G E Y S W S I A Q Y-----K L S E K S P L O S S E-----E N L S D H D E L F V S R V L Q S L L Q K G D C G D N E                                                                                                  | 312  |
| Trypanosoma brucei (Q584D7)      | 205  | -----T P L T S F L H V V L C N V T I H V V R R G M Y K W M S I A Q Y-----K L S E S F P P Q G P E S-----D E G G E K D Q N F I A N V V E Q S Q N S                                                                                                          | 272  |
| Toxoplasma gondii (Q6J2D6)       | 3907 | D G L A K S T T H G G G V E G G E T E K G P L E V A A D G E G S A A L P P P A A P P V E G G A T G A I V R A G L N V P E V A V V A P E V S P V P A K V D R G I P P D S S L A K L L E N G R F E R T F A I Q K L V G Q G G F G V V Y Q V R H L L E P G H     | 4032 |
| Mus musculus (Q9Z2B5)            | 386  | M Y R G Q L Y L Q S S R V S E K F P T S P K A L E S V G E N A I I P L T I K W K P L I H S P S R T P V L V G S D E F D K C L S N                                                                                                                           | 452  |
| Homo sapiens (Q9NZJ5)            | 389  | M Y R G Q L Y L Q S S R V S E K F P T S P K A L E S V T N E N A I I P L T I K W K P L I H S P S R T P V L V G S D E F D K C L S N                                                                                                                         | 455  |
| Drosophila melanogaster (Q9NIV1) | 371  | M Y D K Q L Y I Q E S I R L R O E I M D Q T K V Y Q O L T G D T S L M P R-----I P W K P I S A S S K L Y I F R K D Q E D P E M I A E G A V A Q G G E L V F Y                                                                                               | 447  |
| Leishmania infantum (A4I9Y7)     | 353  | V A Y R R A A D Q A A N T P A A R T S T A V L M R N Q R T H T Q A A D Y I S R V V S V H Q V N E S H V S L R S V H D G T T A W T S A L P H V A R E P S G D G                                                                                               | 432  |
| Leishmania major (Q4Q2Y5)        | 354  | L A Y R R A A D Q A A N T P A A R T S T A V L M R N Q R T H T Q A A D Y I S R V V S V H Q L N A S H V S L R S V H D G T T A W T S L P H V A R E S S G N G                                                                                                 | 433  |
| Leishmania braziliensis (A4HAS7) | 354  | V T H K R P A D P O G E S T P A D R T S T A L L M R N F O R T H T Q A A D Y I S R V V S V H Q V N E S H V S L R S V H D G T T A W T T A W T S L P H A T C E R S P D G                                                                                     | 433  |
| Caenorhabditis elegans (Q19192)  | 374  | H S Q S K A I E D K S L S G S S A R R K I Q I I A S D T E V S A Q R I G T E N L R S T S V K S G D G Y L V L E S E P Q R V K F V N-----S P I T L                                                                                                           | 446  |
| Plasmodium falciparum (Q43948)   | 318  | M L M P K E I Q N L V K K N K D T F K K R L T K N K Y S N N C I S D S S N N N S S C Y A S S Y N S I N S Y R N M K L W I K K                                                                                                                               | 385  |
| Trypanosoma cruzi (Q4E5B6)       | 313  | V P L S T N E N T V D K V N I E P V E E G S H N D I R-----N K Q L M I R E V D R N T V Y L W S E L K H A P V N S                                                                                                                                           | 368  |
| Trypanosoma brucei (Q584D7)      | 273  | -----V R Q A I L A M Q A R L R D A M P P D F K R K T F N-----V D D L V M R E V E N Q R Y T L W N T L T V A E M P                                                                                                                                          | 326  |
| Toxoplasma gondii (Q6J2D6)       | 4033 | F I Y A V K L I L L R L T L S E D I S L R R D F R E V A A N R D L Y S K H V V R Y T W W C E E P R L F V E S L G G S R G A L T D R R G V G S S A V R D S G P R A S V G V T T L T M S P G C L D S A R G S S R F W M E S R E A Q K N L R R T I R D S A V C   | 4158 |
| Mus musculus (Q9Z2B5)            | 453  | -----D K Y S H E Y S N G A L S I L Q Y P D N G Y L L P Y Y-----K R R N K R S T Q I T V R F L D N S H Y N K I R K                                                                                                                                          | 510  |
| Homo sapiens (Q9NZJ5)            | 456  | -----D K Y S H E Y S N G A L S I L Q Y P D N G Y L L P Y Y-----K R R N K R S T Q I T V R F L D N S H Y N K I R K                                                                                                                                          | 513  |
| Drosophila melanogaster (Q9NIV1) | 438  | -----D D E N F A V A A Q S V L N A S E F V N G N G F Y F Y T T G D L N G-----P O E C S T O N N P D L P A I T A P T S P T N A T S E G T A T G N H S V N D D L G F S L D I D A P V K V V                                                                    | 537  |
| Leishmania infantum (A4I9Y7)     | 443  | -----T G S T T S S N A T S V I A A Y V W S G A D E I F R V P-----V L R L A G S V V E E A E Q L R I S M E D A R G A V P T G L P R L T S A L S V A G A L V P I T A H A G R L                                                                                | 517  |
| Leishmania major (Q4Q2Y5)        | 434  | -----T D S T A S S N A T S V I A A Y V W S G A D E I F R V P-----V L R S A G S V V E E A E Q L R I S M E A D A R G A P T G L P R L T S A S V A G A L V P T H A A G R L                                                                                    | 518  |
| Leishmania braziliensis (A4HAS7) | 434  | -----T P S A S S N A T A T V L A A Y V W S G A D E I F R V P-----V L R S I S G S M L E E V E H Q M Q T E N T S D G A A H S L O R L T S T S L G G A L V P T M H T A T G L                                                                                  | 518  |
| Caenorhabditis elegans (Q19192)  | 447  | -----M Q T I P S Y I F N P T A V S F L A G L I G V T V A V Y N-----K I A K S S P R M I E H L S T S P T S A E T E S A S                                                                                                                                    | 502  |
| Plasmodium falciparum (Q43948)   | 386  | -----K E O S P D M K R Y K E V L R K N N A P N L V F Y S-----D N D G L T S K N K N E P K N N P E L S                                                                                                                                                      | 433  |
| Trypanosoma cruzi (Q4E5B6)       | 367  | -----S V M P L S T V M S A F V W F S D R K V H S L P-----V Y R L E T P R S I A D T V E I L P E N T D S                                                                                                                                                    | 419  |
| Trypanosoma brucei (Q584D7)      | 329  | -----A A V G T T S S I V N A F F W H P G R G G V Y I P-----L Y R F H R P T A D A P T H A G R L Q R G                                                                                                                                                      | 375  |
| Toxoplasma gondii (Q6J2D6)       | 4159 | K S R R E D L S S S F L A V Y R Q R E C C R R O T S G R E A T G G R G L A G N A S G L W R R Q P A R R R S L S E A S C A S T S T R H G T A E R E E L L A K Q T S H L S S E A K R D E T L R G T L Q R R R S S P P V E S A S Q R R O D G R E T L P A E F     | 4284 |
| Mus musculus (Q9Z2B5)            | 511  | P I L L L H W N K E I P G T I L L C I V A T-----T F I V R R L F P P H R P Q R K E S E T Q C Q T-----E S K Y D S V A D V S N D W N D M K Y S G-----Y V S R Y L T D F E P I Q C M G R G G F G V V F                                                         | 604  |
| Homo sapiens (Q9NZJ5)            | 514  | P V L L L H W N K E I V A T I F C I I A T-----T F I V R R L F P P H R P Q R K E S E T Q C Q T-----E N K Y D S V S G E A N D S W N D I K N S G-----Y I S R Y L T D F E P I Q C L G R G G F G V V F                                                         | 607  |
| Drosophila melanogaster (Q9NIV1) | 538  | I L S L W F W N K E I V Y I A F T S A V I L N I P M G Q R N Q R V E R E Y L V I E R H R V P V Q T A I E A E A S Q A L L G P V V P M Q R P G N R F S P P G Q A N O R T I S E T T H S G E H-----Y T S R F Q S D F E L M Q C L G R G G F G V V F             | 657  |
| Leishmania infantum (A4I9Y7)     | 518  | Q L W T L M Q S G D S G R G R C R D G G A C G E W A T D V D E A D E R E E T E L A A Y H Q C T W W E T P P V S V P L L A G A F N G E S G A V T Q A I D S A T S S R T V A G T S G V Y S T E N P L L G F D S S G A V V K T G L A W R T A A F I S F H V L C   | 643  |
| Leishmania major (Q4Q2Y5)        | 519  | Q L L T L M Q S G D S G R G R C R D G G A C G E W A T D V D E A D E R E E T E L A A Y H Q C T W W E T P P V S V P L T G A F N G E S G A V T Q A I D S A T S S R T V A G T S G V Y S T E N P L L G F D S S G A V V K T G L A W R T A A F I S F H V L C     | 644  |
| Leishmania braziliensis (A4HAS7) | 519  | Q L L T L M Q S G D S G R G R C R D G G A C G E W A T D V D E A D E R E E T E L A A Y H Q C T W W E A F P V S V P L T G A F N K A N A G A P O A V D Y S T L L R A V S D T K G A Y S S D S P L L G L G N S G A V V K T G L A W R T A A F I S F H V L C     | 643  |
| Caenorhabditis elegans (Q19192)  | 503  | H R T R T S F A P T D E I E R F V E G S D L T T P I G A I H R K P L M P I E K S N I E T H T O P I K P V O R L V K T I D T D E S F S N D E K R L L N R N T I S R S L E G-----F T S R F A N E F E V K V I G H G G G F G V V F                               | 619  |
| Plasmodium falciparum (Q43948)   | 434  | -----D K N F S D S I Y K K K S H D Y N S S K H K K R N K K K S K S K I K T A Q I Y E E S E N D G R D H F Q Y K K G Q F S K I G K L I L W N L W H Y S K N-----M I L L I M V I L S E D R L D I V                                                            | 542  |
| Trypanosoma cruzi (Q4E5B6)       | 420  | Y P S S L N S D Q H S K M S P N L H G F P N W E F D I V A D E L L E R L Q N L Y Q C S I H G C D G S S G N I P N H S P N O R N P A M S S Q M S L S R F L S H T D T-----G N T L L L L F N V S C                                                             | 520  |
| Trypanosoma brucei (Q584D7)      | 376  | -----F P L L S D R P W T H R T V R L K P Y V A T W E D D I D A D E R E T E L O R S F Q Q C S W L Q E C S A N S R Q M V A Y S F R E G M V G N E S I P I L S L Y I L N T M T-----R R T M F F A Q T V C                                                      | 473  |
| Toxoplasma gondii (Q6J2D6)       | 4285 | L E F S L R S A K D A R S Q S R N T R S A S A D S F S P T K K P E R R R R S S L F L S L C G S R S R E E H R Q L E R R R P R A T S R Y P S R Y A G R E R G R S R T D E G W K A E K K L R K S A R G R R G S E S S Y T S E K T D L R S W C P R C E K Q R S V | 4410 |
| Mus musculus (Q9Z2B5)            | 605  | E A K N K V D D C N Y A I-----K R I R L P N R E L A R E K V M R E V K A L A K L E H P G I V R Y N F A W L E T P P E K W O E M B D I W L K D E S-----D W P L S                                                                                             | 681  |
| Homo sapiens (Q9NZJ5)            | 608  | E A K N K V D D C N Y A I-----K R I R L P N R E L A R E K V M R E V K A L A K L E H P G I V R Y N F A W L E A P P E K W O E M B D I W L K D E S-----D W P L S                                                                                             | 684  |
| Drosophila melanogaster (Q9NIV1) | 658  | E A K N K L D E N R Y A I-----K R I T L P N K E S S R Q R V L R E A R T L A S C E H H N I V R Y P H S W E T T P T G W O E E D R K L L A E L S T Q I E-----                                                                                                | 735  |
| Leishmania infantum (A4I9Y7)     | 644  | L A G S I A F L C A G V P-----P R G Q L O R A W A A Q A D R N D R V S H T S S S H Q P S T Q L V P D L L S P H G G R Q T P F S L I M D S F M I D T L G L T L P T A S V A S M A T V S L P H S D D S L-----Q E L M                                           | 744  |
| Leishmania major (Q4Q2Y5)        | 645  | L A G S I A F L C A G V P-----P R G Q L O R A W A A Q A D R N D R V S H T S S S H Q P S T Q L V P D L L S P H G G R Q T P F S L I M D S F M I D T L G L T L P T A S V A S M A T V S L P H S D D S L-----Q E L M                                           | 745  |
| Leishmania braziliensis (A4HAS7) | 644  | L A G S I A F L C A G V P-----P R G Q L O R A W A A Q A D R N D R V S H T S S S R Q S A Q L V P D L L S P H G G R Q T F F N L K D F S M D T P V G N M N G S V N M T T V S L P H S D E S L-----Q E L M                                                     | 744  |
| Caenorhabditis elegans (Q19192)  | 620  | R A Q S I T D M N E Y A Q-----K R I A V A D N D K A R N R V L R P A R A L A M F D H P G I I R Y F Y A M E R P P K G F O E K E D E N L L G K I K-----                                                                                                      | 690  |
| Plasmodium falciparum (Q43948)   | 543  | F A D N E E S G N D Q-----M I R H D N M N N E V I I K R N D D K N G L D G K N G L D G K N G L D E K N L D D N K E D L L M K Q K I N-----                                                                                                                  | 625  |
| Trypanosoma cruzi (Q4E5B6)       | 521  | Y V V S F L S A F L A V I-----F R W Y L W N T T G V G P D A F V D R I S N S S R P G S I K M K P L D P K I S A P Q S V K S I D S A Y K E L E A S H A T E                                                                                                   | 594  |
| Trypanosoma brucei (Q584D7)      | 474  | L V L S A T L V G F G M L-----L P R L R N A W A A Q V S L M N M R O T S K T T P T G F A A A D R S G R F D T P A G E S P A A V F V E S S P S L T                                                                                                           | 546  |
| Toxoplasma gondii (Q6J2D6)       | 4411 | R P H S F P T A K R R A P S I P A L K E R Q E E E E E E A F P S W F F E Q D E S F L T R G M R I E S N D H A A R A R A H R L C C S G D S F S D A E C T Y T N R G S G A F W A G A E A P R S I Q V S G G C T C R W T S G E E T G P R E A S R G D P           | 4536 |
| Mus musculus (Q9Z2B5)            | 682  | -----F S P M D A P S V K I R M D D P F S T K E H I E I A P S P Q R S R S F S V G I S                                                                                                                                                                      | 723  |
| Homo sapiens (Q9NZJ5)            | 685  | -----F S P M D A P S V K I R M D D P F S T K E H I E I A P S P Q R S R S F S V G I S                                                                                                                                                                      | 726  |
| Drosophila melanogaster (Q9NIV1) | 736  | -----T D D S T M P S L T E Q L K E K R Q Q L L S W Y S D A A N S T A C S H D F H L P                                                                                                                                                                      | 777  |
| Leishmania infantum (A4I9Y7)     | 745  | R H H Q L G H L S R S P R S P W Y P A P E Q V R S L T Y E E S E K M L P V T A P T A T T T T T K G T A T S S K A G F G M T P S T A R Q A K T S E T P V K R A A L P S P A D A A A D K A A A S S S S D D D T V D I D G E R W W L R A Q F L                   | 870  |
| Leishmania major (Q4Q2Y5)        | 746  | R H H Q L G H L S G S P R S P W Y P A P E Q V R S I T Y D E S E K M F R V T A P T A K T T R G T A D S S K A G F D M T S S T V O O K A T S E T P V K K A A S S S P A S A A D K A A S A S N S S S D D T V D I D G E R W W L R A Q F S                       | 870  |
