# Supplementary material for: Intracellular Eukaryotic Parasites Have a Distinct Unfolded Protein Response
Source: PubMed Central journal article supplement (PMC3084755; doi:10.1371/journal.pone.0019118), 2011-04-29
Supplement: pone.0019118.s003.pdf [file pone.0019118.s003.pdf]

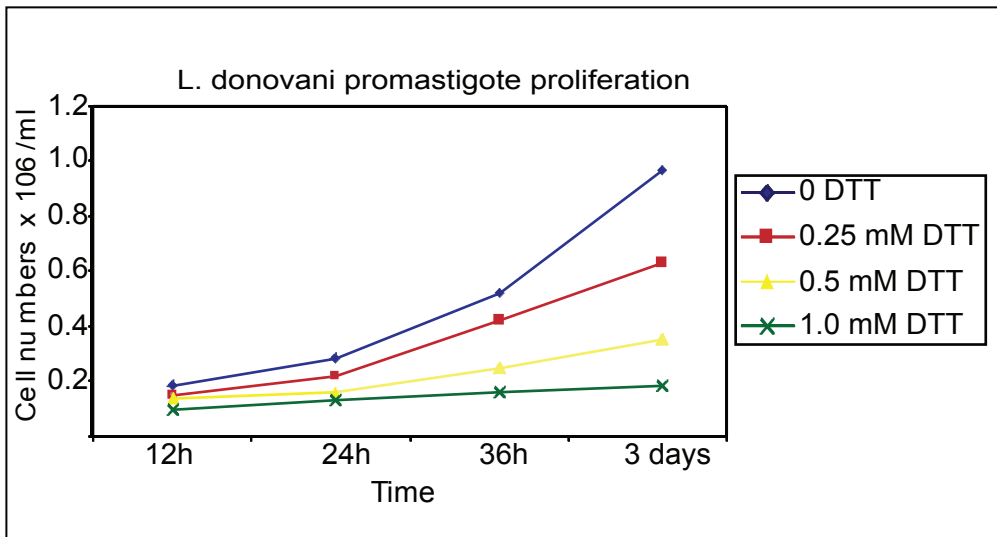

A

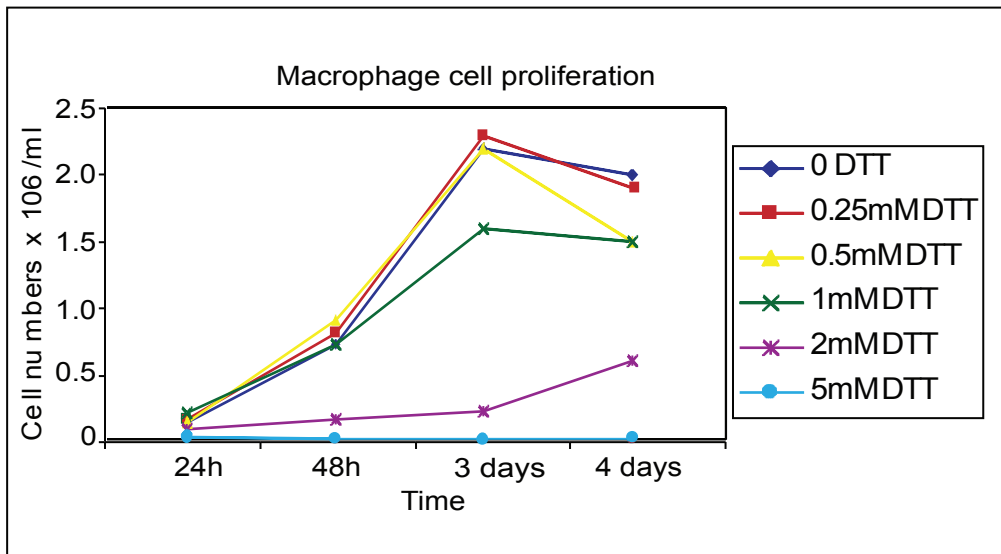

B
