# Supplementary material for: Intracellular Eukaryotic Parasites Have a Distinct Unfolded Protein Response
Source: PLoS One. 2011 Apr 29;6(4):e19118. doi: 10.1371/journal.pone.0019118 (PMC3084755; doi:10.1371/journal.pone.0019118)
Supplement: Table S1 — Protein identifiers of the UPR proteins in the 12 species in this study. For each protein family (indicated by a row describing the family name in boldface), each row indicates a different species identifier. In families for which there are multiple paralogs in a single species, (e.g. Atf6) paralogous genes are replicated in the columns. Absent entries indicate that no ortholog was found for that particular species and protein family. (XLS) [file pone.0019118.s004.xls]

## Sheet: Table S1
	ATF4 Orthologs
HS Common	Atf4
HS Ensembl	ENSG00000128272
HS Uniprot	P18848
MM Common	Atf4
MM Ensembl	ENSMUSG00000042406
MM Uniprot	Q61328
DM Ensembl	CG8669
DM Uniprot	Q9VID3
CE Ensembl	T04C10.4
CE Uniprot	Q22156
AT Gene
AT RefSeq
AT Uniprot
SC Common	GCN4
SC SGD	YEL009C
SC Uniprot
DD RefSeq
DD Uniprot
PF RefSeq
PF Gene
PF Uniprot
LI Gene
LI Uniprot
LM Gene
LM Uniprot
TG Gene
TG Uniprot
TC Gene
TC Uniprot
TB Gene
TB Uniprot
	ATF6 Orthologs
HS Common	ATF6	CREB3L2
HS Ensembl	ENSG00000118217	ENSG00000182158
HS Uniprot	P18850	Q70SY1
MM Common	atf6
MM Ensembl	ENSMUSG00000026663	ENSMUSG00000038648
MM Uniprot	Q8BZ84	Q8BH52
DM Ensembl	CG3136
DM Uniprot	Q7K2V1
CE Ensembl	F45E6.2
CE Uniprot	Q20435
AT Gene	At3g10800
AT RefSeq	NP_187691
AT Uniprot	Q0WV49
SC Common
SC SGD
SC Uniprot
DD RefSeq	XP_642329
DD Uniprot	Q54Y73_DICDI
PF RefSeq
PF Gene
PF Uniprot
LI Gene
LI Uniprot
LM Gene
LM Uniprot
TG Gene
TG Uniprot
TC Gene
TC Uniprot
TB Gene
TB Uniprot
	BiP Orthologs
HS Common	Grp78	Grp78	Grp78
HS Ensembl	ENSG00000044574	ENSG00000044574	ENSG00000044574
HS Uniprot	P11021	P11021	P11021
MM Common	Hspa5	Hspa5	Hspa5
MM Ensembl	ENSMUSG00000026864	ENSMUSG00000026864	ENSMUSG00000026864
MM Uniprot	P20029	P20029	P20029
DM Ensembl	CG4147	CG4147	CG4147
DM Uniprot	P29844	P29844	P29844
CE Ensembl	C15H9.6	C15H9.6	C15H9.6
CE Uniprot	P27420	P27420	P27420
AT Gene	AT1G09080	At5g28540	At5g42020
AT RefSeq	NP_172382	NP_198206	NP_851119
AT Uniprot	Q8H1B3	Q9LKR3	Q39043
SC Common	KAR2	KAR2	KAR2
SC SGD	YJL034W	YJL034W	YJL034W
SC Uniprot	P16474	P16474	P16474
DD RefSeq	XP_643155	XP_643155	XP_643155
DD Uniprot	BIP2_DICDI	BIP2_DICDI	BIP1_DICDI
PF RefSeq	NP_704718	NP_704718	NP_704718
PF Gene	PFI0875w	PFI0875w	PFI0875w
PF Uniprot	Q8I2X4_PLAF7	Q8I2X4_PLAF7	Q8I2X4_PLAF7
LI Gene	LinJ28_V3.1310	LinJ28_V3.1310	LinJ28_V3.1310
LI Uniprot	A4I3J9_LEIIN	A4I3J9_LEIIN	A4I3J9_LEIIN
LM Gene	LmjF28.1200	LmjF28.1200	LmjF28.1200
LM Uniprot	Q4Q8E6_LEIMA	Q4Q8E6_LEIMA	Q4Q8E6_LEIMA
TG Gene	583.m00009	583.m00009	583.m00009
TG Uniprot	Q9U540_TOXGO	O61001_TOXGO	Q9U540_TOXGO
TC Gene	Tc00.1047053506585.40	Tc00.1047053506585.40	Tc00.1047053506585.40
TC Uniprot	Q4D620_TRYCR	Q4D620_TRYCR	Q4D620_TRYCR
TB Gene	Tb11.02.5450	Tb11.02.5450	Tb11.02.5500
TB Uniprot	Q384Q5_9TRYP	Q384Q5_9TRYP	Q384Q5_9TRYP
	Dcr2 Orthologs
HS Common	Dcr2	Dcr2	Dcr2	Dcr2
HS Ensembl
HS Uniprot
MM Common
MM Ensembl
MM Uniprot
DM Ensembl
DM Uniprot
CE Ensembl
CE Uniprot
AT Gene	AT5G57140	AT2G46880	AT5G63140	AT2G46880
AT RefSeq	NP_200524	NP_182211	NP_201119	NP_973704
AT Uniprot	Q9LU72	Q84LR6	Q9FMK9	Q9SLM3
SC Common	DCR2	DCR2	DCR2	DCR2
SC SGD	YLR361C	YLR361C	YLR361C	YLR361C
SC Uniprot	Q05924	Q05924	Q05924	Q05924
DD RefSeq	XP_639081	XP_639081	XP_639081	XP_639081
DD Uniprot	Q54R10_DICDI	Q54R10_DICDI	Q54R10_DICDI	Q54R10_DICDI
PF RefSeq
PF Gene
PF Uniprot
LI Gene
LI Uniprot
LM Gene
LM Uniprot
TG Gene
TG Uniprot
TC Gene
TC Uniprot
TB Gene
TB Uniprot
	eif2a Orthologs
HS Common	EIF-2alpha
HS Ensembl	ENSG00000134001
HS Uniprot	P05198
MM Common	Eif2s1
MM Ensembl	ENSMUSG00000021116
MM Uniprot	Q6ZWX6
DM Ensembl	CG9946
DM Uniprot	P41374
CE Ensembl	Y37E3.10
CE Uniprot	Q9BKU3
AT Gene	AT2G40290
AT RefSeq	NP_565927
AT Uniprot	Q9SIZ2
SC Common	SUI2
SC SGD	YJR007W
SC Uniprot	P20459
DD RefSeq	XP_645435
DD Uniprot	IF2A_DICDI
PF RefSeq	NP_704207
PF Gene	PF07_0117
PF Uniprot	Q8IBH7_PLAF7
LI Gene	LinJ03_V3.0960
LI Uniprot	A4HRY4_LEIIN
LM Gene	LmjF03.0980
LM Uniprot	Q9NKJ7_LEIMA
TG Gene	583.m00670
TG Uniprot	Q6JD67_TOXGO
TC Gene	Tc00.1047053508153.730
TC Uniprot	Q4E620_TRYCR
TB Gene	Tb927.3.2900
TB Uniprot	Q57ZM2_9TRYP
	Hac1/Xbp1 Orthologs
HS Common	XBP1
HS Ensembl	ENSG00000100219
HS Uniprot	P17861
MM Common	Xbp1
MM Ensembl	ENSMUSG00000020484
MM Uniprot	O35426
DM Ensembl	CG9415
DM Uniprot	Q8MLW7
CE Ensembl	R74.3
CE Uniprot	Q8WRF1
AT Gene	AT1G42990
AT RefSeq	NP_174998
AT Uniprot	Q9C7S0
SC Common	HAC1
SC SGD	YFL031W
SC Uniprot	P41546
DD RefSeq
DD Uniprot
PF RefSeq
PF Gene
PF Uniprot
LI Gene
LI Uniprot
LM Gene
LM Uniprot
TG Gene
TG Uniprot
TC Gene
TC Uniprot
TB Gene
TB Uniprot
	DNAJC3 Orthologs
HS Common	DNAJC3	DNAJC3
HS Ensembl	ENSG00000102580	ENSG00000102580
HS Uniprot	Q13217	Q13217
MM Common	Dnajc3b	Dnajc3b
MM Ensembl	ENSMUSG00000022136	ENSMUSG00000022136
MM Uniprot	Q91YW3	Q91YW3
DM Ensembl	CG8286	CG8286
DM Uniprot	Q9VHA8	Q9VHA8
CE Ensembl	Y54E10BL.4	Y54E10BL.4
CE Uniprot	Q9N3E0	Q9N3E0
AT Gene	At5g03160	At5g03160
AT RefSeq
AT Uniprot	Q9LYW9	Q9LYW9
SC Common
SC SGD
SC Uniprot
DD RefSeq
DD Uniprot	DNJC3_DICDI	DNJC3_DICDI
PF RefSeq
PF Gene	Pf3D7_05	Pf3D7_05
PF Uniprot	Q8I489_PLAF7	Q8I489_PLAF7
LI Gene	LinJ14_V3.1410	LinJ14_V3.1410
LI Uniprot	A4HW79_LEIIN	A4HW79_LEIIN
LM Gene	LmjF14.1330	LmjF14.1330
LM Uniprot	Q4QFK1_LEIMA	Q4QFK1_LEIMA
TG Gene
TG Uniprot
TC Gene	Tc00.1047053509937.160	Tc00.1047053510407.80
TC Uniprot	Q4DSP8_TRYCR	Q4D7D9_TRYCR
TB Gene	Tb927.7.3630	Tb927.7.3630
TB Uniprot	Q57WH8_9TRYP	Q57WH8_9TRYP
	Ire1 Orthologs
HS Common	Ire1b	Ire1a
HS Ensembl	ENSG00000134398	ENSG00000178607
HS Uniprot	Q76MJ5	O75460
MM Common	ern2	ern1
MM Ensembl	ENSMUSG00000030866	ENSMUSG00000020715
MM Uniprot	Q9Z2E3	Q9EQY0
DM Ensembl	CG4583	CG4583
DM Uniprot	A8JR47	A8JR46
CE Ensembl	C41C4.4	C41C4.4
CE Uniprot	Q09499	Q09499
AT Gene	AT5G24360	AT2G17520
AT RefSeq	NP_568444	NP_565419
AT Uniprot	Q93VJ2	Q9C5S2
SC Common	IRE1	IRE1
SC SGD	YHR079C	YHR079C
SC Uniprot	P32361	P32361
DD RefSeq	XP_647192	XP_647192
DD Uniprot	IREA_DICDI	IREA_DICDI
PF RefSeq
PF Gene
PF Uniprot
LI Gene
LI Uniprot
LM Gene
LM Uniprot
TG Gene
TG Uniprot
TC Gene
TC Uniprot
TB Gene
TB Uniprot
	ORM1/2 Orthologs
HS Common	ORML3	ORML2	ORML1
HS Ensembl	ENSG00000172057	ENSG00000123353	ENSG00000128699
HS Uniprot	Q8N138	Q53FV1	Q9P0S3
MM Common	Ormdl3	Ormdl1	Ormdl2
MM Ensembl	ENSMUSG00000038150	ENSMUSG00000026097	ENSMUSG00000025353
MM Uniprot	Q9CPZ6	Q921I0	Q9CQZ0
DM Ensembl	CG14577	CG14577	CG14577
DM Uniprot	Q9VP04	Q9VP04	Q9VP04
CE Ensembl
CE Uniprot
AT Gene	AT5G42000		AT1G01230
AT RefSeq	NP_199015		NP_563622
AT Uniprot	Q9FHY3		Q9C5I0
SC Common	ORM1		ORM2
SC SGD	YGR038W		YLR350W
SC Uniprot	P53224		Q06144
DD RefSeq	XP_636555		XP_636555
DD Uniprot	Q54IC2_DICDI		Q54IC2_DICDI
PF RefSeq
PF Gene
PF Uniprot
LI Gene
LI Uniprot
LM Gene
LM Uniprot
TG Gene
TG Uniprot
TC Gene
TC Uniprot
TB Gene
TB Uniprot
	PERK Orthologs
HS Common	PERK
HS Ensembl	ENSG00000172071
HS Uniprot	Q9NZJ5
MM Common	Eif2ak3
MM Ensembl	ENSMUSG00000031668
MM Uniprot	Q9Z2B5
DM Ensembl	CG2087
DM Uniprot	Q9NIV1
CE Ensembl	F46C3.1
CE Uniprot	Q19192
AT Gene
AT RefSeq
AT Uniprot
SC Common
SC SGD
SC Uniprot
DD RefSeq
DD Uniprot
PF RefSeq
PF Gene
PF Uniprot	O43948_PLAFA
LI Gene	LinJ34_V3.1910
LI Uniprot	A4I9Y7_LEIIN
LM Gene	LmjF34.2150
LM Uniprot	Q4Q2Y5_LEIMA
TG Gene	44.m06354
TG Uniprot	Q6JD66_TOXGO
TC Gene	Tc00.1047053506559.129
TC Uniprot	Q4E5B6_TRYCR
TB Gene	Tb927.4.2500
TB Uniprot	Q584D7_9TRYP
	Rlg1 Orthologs
HS Common	Rlg1
HS Ensembl
HS Uniprot
MM Common
MM Ensembl
MM Uniprot
DM Ensembl
DM Uniprot
CE Ensembl
CE Uniprot
AT Gene
AT RefSeq
AT Uniprot
SC Common	TRL1
SC SGD	YJL087C
SC Uniprot	P09880
DD RefSeq
DD Uniprot
PF RefSeq
PF Gene
PF Uniprot
LI Gene
LI Uniprot
LM Gene
LM Uniprot
TG Gene
TG Uniprot
TC Gene
TC Uniprot
TB Gene
TB Uniprot
