# Supplementary material for: Intracellular Eukaryotic Parasites Have a Distinct Unfolded Protein Response
Source: PLoS One. 2011 Apr 29;6(4):e19118. doi: 10.1371/journal.pone.0019118 (PMC3084755; doi:10.1371/journal.pone.0019118)
Supplement: Table S3 — UPR specificity scores of each protein domain in each species. (XLS) [file pone.0019118.s006.xls]

## Sheet: Sheet1
	Human	Mouse	Fly	Worm	Plant	Yeast	DD	Plasmodium	Toxoplasma	TCruzi	TBrucei	LInfantum
bZIP_1	7.52312	7.19993	8.73299	7.22322	4.83984	0	6.8647	NA	NA	NA	NA	NA
TF_bZIP	7.28849	6.82728	7.68237	7.54515	5.32911	5.94837	6.52367	NA	NA	0	0	0
TransmembraneDomain	1.67577	1.44505	0.826103	0.268246	1.06863	0.997277	0.222289	0.0129779	-0.202588	-0.509485	0.11807	0.280236
ER_target_S	5.29696	4.85391	6.21842	6.50075	6.54455	6.15482	8.60167	7.70995	6.91289	0	0	0
Heat_shock_70_CS	6.19855	6.25409	7.21842	8.08571	8.95958	5.94837	7.77159	9.70995	5.49785	7.42298	8.03892	7.51516
Hsp70	5.95146	6.16246	7.21842	8.08571	8.30247	5.85526	8.60167	8.70995	5.6905	6.72254	7.62388	7.16724
Hsp_70	6.06249	6.18483	7.21842	8.08571	8.26771	5.85526	8.60167	8.70995	5.6905	6.76001	7.74941	7.0677
SignalPeptide	1.24576	1.16565	1.06259	1.38527	1.88421	1.63126	2.14133	1.84886	0.0221184	1.93079	2.31807	2.18832
EIF_2_alpha	12.7063	12.1848	6.50635	6.96578	9.3381	9.85526	6.96578	8.38082	7.96578	7.64386	7.96578	7.96578
OB_NA_bd_sub	5.3665	4.85391	5.37042	6.08571	3.95266	4.72597	5.34533	5.66555	6.49785	6.33551	6.16445	6.11661
S1_RNA_bd	7.95146	7.54097	7.83991	9.22322	6.70583	7.2703	8.18663	8.70995	7.96578	12.0079	10.2088	7.96578
bZIP_2	7.53642	6.7254	7.63346	8.60655	6.61563	8.2703	0	NA	NA	NA	NA	NA
DnaJ_N	5.67292	5.18483	5.47426	6.37522	4.08259	0	5.56214	0	0	5.85819	5.0591	4.88713
Heat_shock_DnaJ_CS	6.16719	5.82728	0	0	5.10543	0	6.18663	0	0	0	0	0
Hsp40/DnaJ_Rel	5.5668	5.42994	5.68237	6.33569	3.86561	0	6.24803	0	0	6.10105	5.30195	5.1417
TPR_1	4.3444	4.30218	4.98576	6.11888	4.32911	0	5.09917	0	0	6.94185	5.78258	5.80467
TPR-like_helical	3.76677	3.64955	3.94044	5.22322	3.31573	0	4.05735	0	0	5.84807	4.85129	4.88713
TPR_region	4.03039	4.0149	4.30194	5.61441	3.78966	0	4.48619	0	0	6.40803	5.45396	5.30217
TPR_repeat	4.1327	4.07109	4.54035	5.76379	3.99469	0	4.66307	0	0	6.40803	5.45396	5.33074
PQQ_beta_propeller_repeat	10.2469	9.8629	11.1253	10.5451	9.66002	6.96578	10.7716	NA	NA	0	NA	NA
PQQ_repeat	10.899	10.7698	6.50635	7.96578	0	NA	NA	NA	NA	NA	0	NA
Prot_kinase	3.46397	3.23063	3.58228	3.43662	1.84785	2.92452	2.82323	4.20215	2.17592	3.38589	3.66195	3.38963
Protein_kinase_ATP_BS	3.90977	3.50887	2.2005	4.02551	0	3.00977	2.8174	5.38802	2.91289	0	0	0
PUG	10.899	10.3775	11.5403	11.5451	8.85267	6.96578	6.96578	0	NA	NA	NA	NA
Ribonuc_2-5A	11.1214	10.0149	7.50635	6.96578	10.0751	6.96578	6.96578	NA	NA	NA	NA	NA
Se/Thr_pkinase-rel	3.86924	3.61877	4.36376	4.01767	2.12962	2.98489	3.09211	4.75575	2.6905	3.45335	3.75763	3.43544
Ser_thr_pkin_AS	4.21316	3.89021	4.59393	4.33569	2.28065	2.97261	2.91984	4.8273	2.79741	3.76953	3.98003	3.68919
ORMDL	12.2913	13.7698	6.50635	NA	12.66	10.8553	10.7716	NA	NA	NA	NA	NA
Quin_alc_DH_like	9.89899	12.1848	6.50635	10.9602	9.07506	NA	NA	NA	NA	0	0	10.9746
TPR_2	0	0	5.86792	0	6.70583	0	0	0	NA	0	0	0
M-pesterase	0	0	0	0	6.78555	5.46294	5.8174	0	0	0	0	0
